# Supplementary material for: Association between aspirin use and lung cancer incidence depends on high-frequency use, bodyweight, and age in U.S. adults
Source: PubMed Central journal article supplement — Transl Lung Cancer Res. 2021 Jan;10(1):392–401. doi: 10.21037/tlcr-20-414 (PMC7867785; doi:10.21037/tlcr-20-414), 2021-01
Supplement: tlcr-10-01-392-supplementary.pdf [file tlcr-10-01-392-supplementary.pdf]

## Supplementary

**Table S1** Relationship between high-frequency aspirin use and lung cancer incidence among participants with different smoked status

| Smoked status            | N      | Lung cancer event | Crude incidence (%) | HR                                        |
|--------------------------|--------|-------------------|---------------------|-------------------------------------------|
| Never smoked cigarettes  | 48,553 | 115               | 0.24                | 1.15 (0.74–1.78), P=0.54                  |
| Former cigarette smoker  | 43,761 | 723               | 1.65                | 1.14 (0.96–1.35), P=0.11                  |
| <15 years                | 15,116 | 452               | 2.99                | 1.05 (0.85–1.29), P=0.67                  |
| ≥15 years                | 27,819 | 261               | 0.94                | 1.18 (0.89–1.56), P=0.26                  |
| Current cigarette smoker | 9,395  | 590               | 6.28                | 1.30 (1.07–1.57), P=6.82×10 <sup>-3</sup> |

Cox regression model adjusted for propensity score calculated using age, pack-years of smoking, gender, race, screening arm, body mass index, diabetes, and intake of alcohol, total energy, vitamin C, vitamin E, folate, calcium, red meat, processed meat, lycopene, alpha-carotene, fruit, vegetables, and fat. High-frequency use: ≥1 pill per day. HR, hazard ratio.

**Table S2** Relationship between aspirin use and lung cancer incidence among participants with cardiac-cerebral vascular disease

| Aspirin frequency   | N     | Lung cancer event | Crude incidence (%) | HR <sub>Model 1</sub> <sup>*</sup> | HR <sub>Model 2</sub> <sup>†</sup> | HR <sub>Model 3</sub> <sup>‡</sup> |
|---------------------|-------|-------------------|---------------------|------------------------------------|------------------------------------|------------------------------------|
| Linear trend        | 9,731 | 197               | 2.02                | 1.06 (0.94–1.19), P=0.33405        | 1.05 (0.93–1.18), P=0.45577        | 1.04 (0.92–1.17), P=0.52911        |
| No use              | 2,080 | 39                | 1.87                | Ref                                | Ref                                | Ref                                |
| Irregular-frequency | 310   | 4                 | 1.29                | 0.73 (0.26–2.06), P=0.55698        | 0.73 (0.26–2.05), P=0.55529        | 0.71 (0.25–1.99), P=0.51526        |
| Low-frequency       | 742   | 12                | 1.61                | 0.82 (0.43–1.56), P=0.53584        | 0.81 (0.43–1.55), P=0.53059        | 0.81 (0.42–1.55), P=0.5229         |
| High-frequency      | 6,599 | 142               | 2.15                | 1.15 (0.81–1.64), P=0.44301        | 1.11 (0.78–1.58), P=0.57874        | 1.08 (0.76–1.54), P=0.66508        |

<sup>\*</sup>, Model 1: Cox regression model adjusted for age; <sup>†</sup>, Model 2: Cox regression model adjusted for propensity score calculated using age, pack-years of smoking, gender, race, screening arm, body mass index, diabetes; <sup>‡</sup>, Model 3: Cox regression model adjusted for propensity score calculated using age, pack-years of smoking, gender, race, screening arm, body mass index, diabetes, and intake of alcohol, total energy, vitamin C, vitamin E, folate, calcium, red meat, processed meat, lycopene, alpha-carotene, fruit, vegetables, and fat. Irregular-frequency use: 1 pill per week; Low-frequency use: 1–4 pills per week; High-frequency use: ≥1 pill per day. HR, hazard ratio.

**Table S3** Association between aspirin use and lung cancer incidence according to bodyweight

| Aspirin frequency   | Bodyweight (kg) | N     | Lung cancer event | Crude incidence (%) | HR   | CI   | CU   | P        |
|---------------------|-----------------|-------|-------------------|---------------------|------|------|------|----------|
| High-frequency      | <70             | 6,370 | 119               | 1.87                | 1.48 | 1.18 | 1.86 | 6.70E-04 |
|                     | 70–79           | 6,450 | 114               | 1.77                | 1.39 | 1.1  | 1.76 | 5.91E-03 |
|                     | 80–89           | 5,886 | 87                | 1.47                | 1.06 | 0.81 | 1.39 | 6.69E-01 |
|                     | ≥90             | 7,530 | 126               | 1.67                | 1.27 | 1    | 1.61 | 4.98E-02 |
| Low-frequency       | <70             | 4,071 | 61                | 1.50                | 1.23 | 0.93 | 1.64 | 1.49E-01 |
|                     | 70–79           | 3,459 | 45                | 1.30                | 1.04 | 0.75 | 1.44 | 8.09E-01 |
|                     | 80–89           | 2,820 | 29                | 1.03                | 0.74 | 0.5  | 1.11 | 1.45E-01 |
|                     | ≥90             | 2,940 | 30                | 1.03                | 0.76 | 0.51 | 1.13 | 1.71E-01 |
| Irregular-frequency | <70             | 2,954 | 47                | 1.59                | 1.21 | 0.88 | 1.67 | 2.36E-01 |
|                     | 70–79           | 2,417 | 34                | 1.41                | 1.1  | 0.77 | 1.56 | 5.97E-01 |
|                     | 80–89           | 2,020 | 30                | 1.49                | 1.1  | 0.74 | 1.64 | 6.27E-01 |
|                     | ≥90             | 2,339 | 28                | 1.20                | 0.92 | 0.61 | 1.38 | 6.85E-01 |

Cox regression model adjusted for propensity score calculated using age, pack-years of smoking, gender, race, screening arm, body mass index, diabetes, heart disease and stroke history, and intake of alcohol, total energy, vitamin C, vitamin E, folate, calcium, red meat, processed meat, lycopene, alpha-carotene, fruit, vegetables, and fat. Irregular-frequency use: 1 pill per week; Low-frequency use: 1–4 pills per week; High-frequency use: ≥1 pill per day. HR, hazard ratio; CI, lower confidence interval; CU, upper confidence interval.

**Table S4** Association between aspirin use and lung cancer incidence according to bodyweight among participants without cardiac-cerebral vascular disease

| Aspirin frequency   | Bodyweight (kg) | N     | Lung cancer event | Crude incidence (%) | HR   | CI   | CU   | P        |
|---------------------|-----------------|-------|-------------------|---------------------|------|------|------|----------|
| High-frequency      | <70             | 3,640 | 60                | 1.65                | 1.41 | 1.1  | 1.81 | 6.28E-03 |
|                     | 70–79           | 2,987 | 50                | 1.67                | 1.25 | 0.95 | 1.64 | 1.05E-01 |
|                     | 80–89           | 2,465 | 29                | 1.18                | 0.98 | 0.71 | 1.35 | 8.82E-01 |
|                     | ≥90             | 2,560 | 39                | 1.52                | 1.21 | 0.92 | 1.59 | 1.73E-01 |
| Low-frequency       | <70             | 3,004 | 43                | 1.43                | 1.26 | 0.94 | 1.69 | 1.19E-01 |
|                     | 70–79           | 2,336 | 24                | 1.03                | 1.08 | 0.77 | 1.5  | 6.63E-01 |
|                     | 80–89           | 1,777 | 21                | 1.18                | 0.7  | 0.45 | 1.09 | 1.12E-01 |
|                     | ≥90             | 1,620 | 18                | 1.11                | 0.77 | 0.51 | 1.16 | 2.18E-01 |
| Irregular-frequency | <70             | 2,296 | 40                | 1.74                | 1.27 | 0.92 | 1.75 | 1.42E-01 |
|                     | 70–79           | 1,775 | 29                | 1.63                | 1.08 | 0.75 | 1.55 | 6.89E-01 |
|                     | 80–89           | 1,385 | 21                | 1.52                | 1.18 | 0.79 | 1.77 | 4.24E-01 |
|                     | ≥90             | 1,419 | 18                | 1.27                | 0.94 | 0.62 | 1.43 | 7.85E-01 |

Cox regression model adjusted for propensity score calculated using age, pack-years of smoking, gender, race, screening arm, body mass index, diabetes, and intake of alcohol, total energy, vitamin C, vitamin E, folate, calcium, red meat, processed meat, lycopene, alpha-carotene, fruit, vegetables, and fat. Irregular-frequency use: 1 pill per week; Low-frequency use: 1–4 pills per week; High-frequency use: ≥1 pill per day. HR, hazard ratio; CI, lower confidence interval; CU, upper confidence interval.

**Table S5** Association between aspirin use and lung cancer incidence according to bodyweight among participants with cardiac-cerebral vascular disease

| Aspirin frequency   | Bodyweight (kg) | N     | Lung cancer event | Crude incidence (%) | HR   | CI   | CU    | P        |
|---------------------|-----------------|-------|-------------------|---------------------|------|------|-------|----------|
| High-frequency      | <70             | 2,689 | 57                | 2.12                | 1.33 | 0.6  | 2.95  | 4.88E-01 |
|                     | 70–79           | 3,431 | 63                | 1.84                | 1.31 | 0.65 | 2.65  | 4.50E-01 |
|                     | 80–89           | 3,400 | 58                | 1.71                | 0.77 | 0.39 | 1.52  | 4.50E-01 |
|                     | ≥90             | 4,942 | 87                | 1.76                | 1.22 | 0.62 | 2.43  | 5.66E-01 |
| Low-frequency       | <70             | 1,048 | 18                | 1.72                | 0.74 | 0.16 | 3.51  | 7.08E-01 |
|                     | 70–79           | 1,100 | 20                | 1.82                | 0.55 | 0.12 | 2.53  | 4.43E-01 |
|                     | 80–89           | 1,025 | 8                 | 0.78                | 1.09 | 0.39 | 3.02  | 8.75E-01 |
|                     | ≥90             | 1,298 | 12                | 0.92                | 0.6  | 0.13 | 2.77  | 5.17E-01 |
| Irregular-frequency | <70             | 636   | 1                 | 0.16                | /    | /    | /     | /        |
|                     | 70–79           | 628   | 5                 | 0.80                | 3.29 | 0.87 | 12.46 | 7.94E-02 |
|                     | 80–89           | 621   | 9                 | 1.45                | 0.52 | 0.07 | 4.05  | 5.34E-01 |
|                     | ≥90             | 900   | 1                 | 0.11                | /    | /    | /     | /        |

Cox regression model adjusted for propensity score calculated using age, pack-years of smoking, gender, race, screening arm, body mass index, diabetes, and intake of alcohol, total energy, vitamin C, vitamin E, folate, calcium, red meat, processed meat, lycopene, alpha-carotene, fruit, vegetables, and fat. Irregular-frequency use: 1 pill per week; Low-frequency use: 1–4 pills per week; High-frequency use: ≥1 pill per day. HR, hazard ratio; CI, lower confidence interval; CU, upper confidence interval.

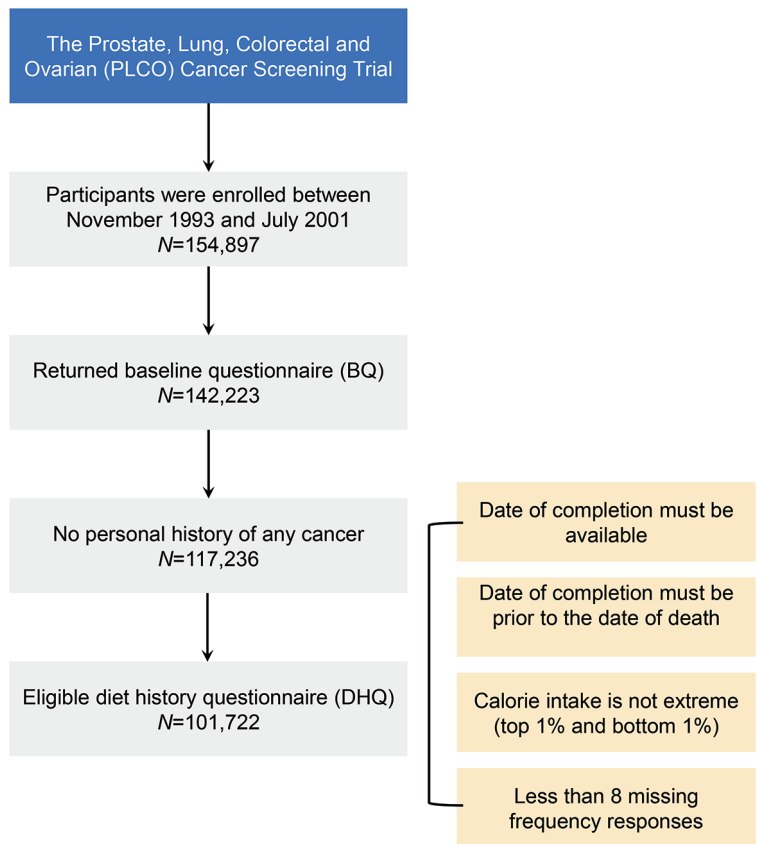

**Figure S1** Flowchart for the participants selection.

**Participants with cardiac-cerebral vascular disease**

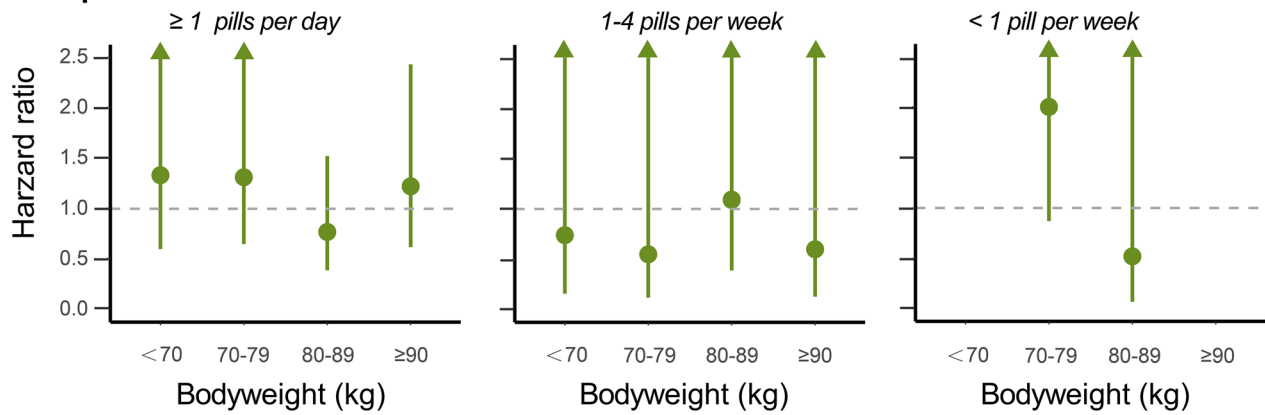

**Figure S2** Association between aspirin use and risk of lung cancer according to bodyweight. Size of circles representing point estimates of hazard ratios is proportional to inverse of variance of the estimate.
